# Supplementary material
Source: PubMed Central journal article supplement (PMC1356547)

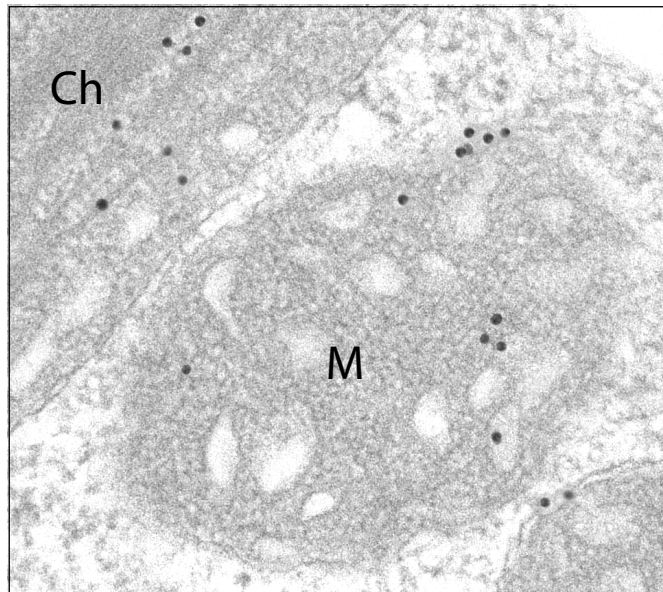

Figure S1. Enlarged image of Figure 1F.

Supplement: plntcell_tpc.105.036251_1.pdf [file plntcell_tpc.105.036251_1.pdf]
